# Supplementary material for: Identification and Testing of Antidermatophytic Oxaborole-6-Benzene Sulphonamide Derivative (OXBS) from Streptomyces atrovirens KM192347 Isolated from Soil
Source: PubMed Central journal article supplement (PMC7235740; doi:10.3390/antibiotics9040176), 2020-04-13
Supplement: antibiotics-09-00176-s001.pdf [file antibiotics-09-00176-s001.pdf]

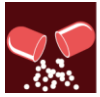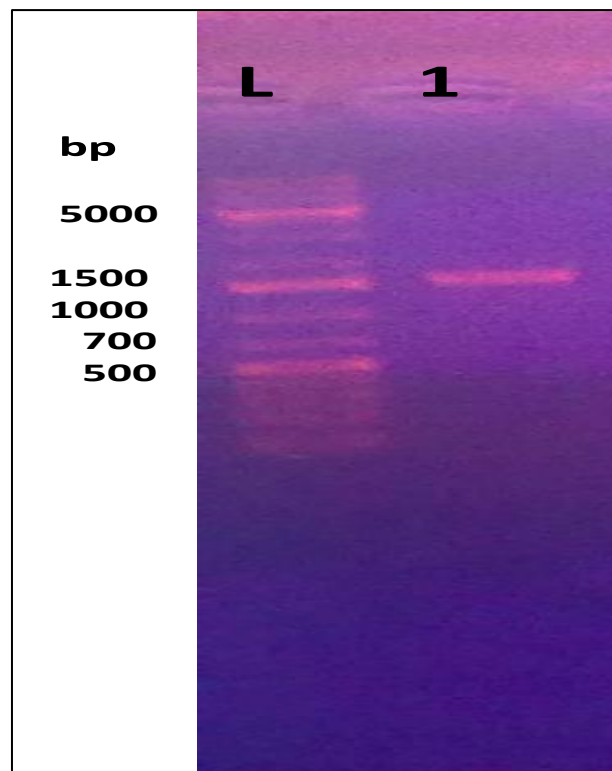

**Figure S1.** The 16S rRNA gene amplified by polymerase chain reaction (PCR) of the tested *Streptomyces* strain (KM192347). Where, L; GeneRuler™ 1 Kb Plus DNA ladder and Lane 1: *Streptomyces* strain KM192347.

```
TGCTCAGGACGAACGCTGGCGGCGTGCTTAAACACATGCAAGTCGAACGATGAACCACTTC
GGTGGGGATTAGTGGCGAACGGGTGAGTAACACGTGGGCAATCTGCCCTGCACTCTGGGA
CAAGCCCTGGAAACGGGGTCTAATACCGGATACTGACCCGCCTGGGCATCCAGGCGGTTTC
GAAAGCTCCGGCGGTGCAGGATGAGCCCGCGGCCTATCAGCTTGTTGGTGAGGTAACGGC
TCACCAAGGCGACGACGGGTAGCCGGCCTGAGAGGGCGACCGGCCACACTGGGACTGAGA
CACGGCCAGACTCCTACGGGAGGCAGCAGTGGGGAATATTGCACAATGGGCGCAAGCCT
GATGCAGCGACGCCGCGTGAGGGATGACGGCCTTCGGGTTGTAAACCTCTTTCAGCAGGG
AAGAAGCGCAAGTGACGGTACCTGCAGAAGAAGCGCCGGCTAACTACGTGCCAGCAGCCG
CGGTAATACGTAGGGCGCGAGCGTTGTCCGGAATTATTGGGCGTAAAGAGCTCGTAGGGC
GCTTGTTCGCGTCGGTTGTGAAAGCCCGGGGCTTAAACCCCGGGTCTGCAGTCGATACGGGC
AGGCTAGAGTTCGGTAGGGGAGATCGGAATTCCTGGTGTAGCGGTGAAATGCGCAGATAT
CAGGAGGAACACCGGTGGCGAAGGCGGATCTCTGGGCCGATACTGACGCTGAGGAGCGAA
AGCGTGGGGAGCGAACAGGATTAGATACCCTGGTAGTCCACGCCGTAAACGGTGGGCACT
AGGTGTGGGCGACATTCCACGTCGTCCGTGCCGCAGCTAACGCATTAAGTGCCCCGCCTG
GGGAGTACGGCCGCAAGGCTAAAACCTCAAAGGAATTGACGGGGGCCCGCACAAAGCGGCGG
AGCATGTGGCTTAATTTCGACGCAACCGGAAGAACCTTACCAAGGCTTGACATACACCGGA
AACGTCTGGAGACAGGCGCCCCCTTGTGGTTCGGTGTACAGGTGGTGCATGGCTGTCTGCA
GCTCGTGTCTGAGATGTTGGGTTAAGTCCC GCAACGAGCGCAACCCTTGTCCCGTGTTG
CCAGCAAGCCCTTCGGGGTGTGGGGACTCACGGGAGACCGCCGGGGTCAACTCGGAGGA
AGGTGGGGACGACGTCAAGTCATCATGCCCTTATGTCTTGGGCTGCACACGTGCTACAA
TGGCCGGTACAATGAGCTGCGATACCGCGAGGTGGAGCGAATCTCAAAAAGCCGGTCTCA
GTTCCGATTGGGGTCTGCAACTCGACCCCATGAAGTCGGAGTCGCTAGTAATCGCAGATC
```

**Figure S2.** Sequence of 16S rRNA of *Streptomyces* strain KM192347. eluted PCR product, contains 1445bp.
